# Supplementary material for: Total Nut, Tree Nut, and Peanut Consumption and Metabolic Status in Southern Italian Adults
Source: MDPI journal article supplement (doi:10.3390/ijerph18041847), 2021-02-14

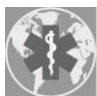

Article

# Total Nut, Tree Nut and Peanut Consumption and Metabolic Status in Southern Italian Adults

Agnieszka Micek <sup>1,\*</sup>, Justyna Godos <sup>2</sup>, Achille Cernigliaro <sup>3</sup>, Raffaele Ivan Cincione <sup>4</sup>, Silvio Buscemi <sup>5</sup>, Massimo Libra <sup>2,6</sup>, Fabio Galvano <sup>2</sup> and Giuseppe Grosso <sup>2</sup>

Supplementary Figure S1. The study enrollment process.

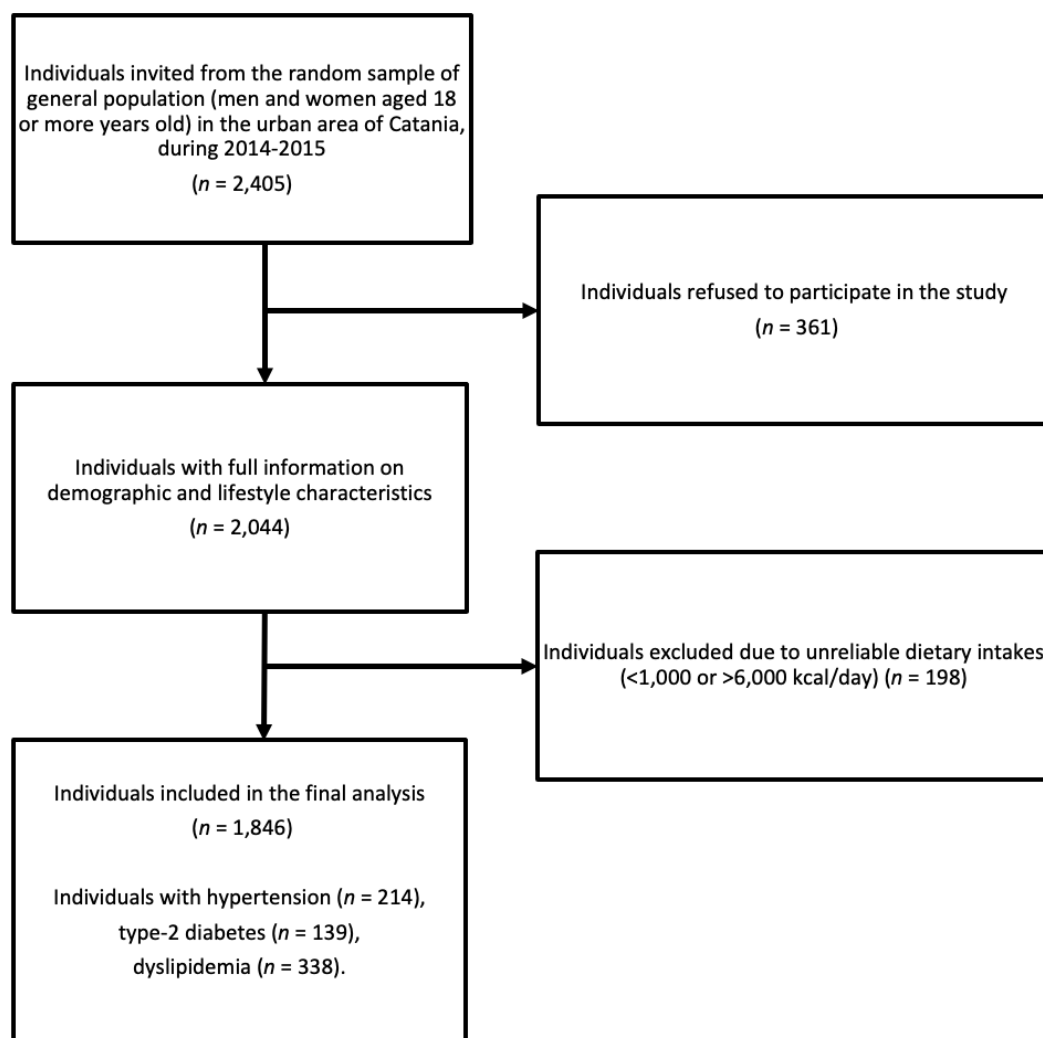

Supplement: s1 [file s1]
